# Supplementary material for: Effectiveness of trauma-focused art therapy (TFAT) for psychological trauma: study protocol of a multiple-baseline single-case experimental design
Source: PubMed Central journal article supplement — BMJ Open. 2024 Jan 29;14(1):e081917. doi: 10.1136/bmjopen-2023-081917 (PMC10826536; doi:10.1136/bmjopen-2023-081917), 2024-01-29
Supplement: bmjopen-2023-081917supp002.pdf [file bmjopen-2023-081917supp002.pdf]

**Supplementary File B: Interview guide****Interview guide 1) patient participants:**

Focused on Client Change Interview Schedule

| Subject              | Main question                                                                       | Sub-questions                                                                                                                                                                                                                                                                                                                                                     | Purpose                                          |
|----------------------|-------------------------------------------------------------------------------------|-------------------------------------------------------------------------------------------------------------------------------------------------------------------------------------------------------------------------------------------------------------------------------------------------------------------------------------------------------------------|--------------------------------------------------|
| <b>Opening</b>       | Hello, how nice that we can interview you for the research you participated in.     | <ul style="list-style-type: none"> <li>a) I'm going to turn on the recorder and then, as far as I'm concerned, we can start the interview.</li> <li>b) I am very curious about your experiences with art therapy. It's not a test; So it doesn't matter if you don't know something for a while. Try to answer as honestly as possible. Are you ready?</li> </ul> | Open call/ start recording/ reassure participant |
| <b>General view</b>  | How did you experience the art therapy in general?                                  | <ul style="list-style-type: none"> <li>a) How did you find the structure (per phase) (making an inventory, coming to a choice of memories?)</li> <li>b) How did you feel about working out your memories in images? (both positive and negative)</li> <li>c) Phase 3: How did you come to a conclusion?</li> </ul>                                                | Painting a general picture                       |
| <b>Visual work</b>   | How did you go about the sessions?                                                  | <ul style="list-style-type: none"> <li>a) Can you describe what you did during the therapy? (possibly: artworks included)</li> <li>b) What materials did you use to do this?</li> <li>c) Which assignments did you find particularly helpful/which did you find less so?</li> </ul>                                                                               | Learning how the participant works visually      |
| <b>Changes</b>       | What changes have you noticed in your symptoms since you started art therapy?       | <ul style="list-style-type: none"> <li>a) Has anything improved since you started?</li> <li>b) Has anything deteriorated since you started?</li> <li>c) Has something NOT changed that you expected?</li> <li>d) Would these changes have happened even if you hadn't had the therapy?</li> </ul>                                                                 | Mapping changes in complaints                    |
| <b>Cause changes</b> | What do you think have caused these changes?                                        | <ul style="list-style-type: none"> <li>a) What helped during the sessions? Think of materials, instructions or the attitude of your therapist?</li> <li>b) Zoom in on answer</li> </ul>                                                                                                                                                                           | Attribution mapping                              |
| <b>Improvements</b>  | Are there things you would like to change about art therapy as it has been offered? | <ul style="list-style-type: none"> <li>a) Are there things you found too difficult or too easy?</li> <li>b) Are there things you missed in the sessions?</li> </ul>                                                                                                                                                                                               | Mapping suggestions                              |

|                     |                                                       |                                                                                                                                                                                                                                                                                                                                     |                                   |
|---------------------|-------------------------------------------------------|-------------------------------------------------------------------------------------------------------------------------------------------------------------------------------------------------------------------------------------------------------------------------------------------------------------------------------------|-----------------------------------|
|                     |                                                       | c) What is the quality of these ten sessions?                                                                                                                                                                                                                                                                                       |                                   |
| <b>The research</b> | What was it like for you to participate in the study? | a) How did you feel about completing the questionnaires on a weekly basis?                                                                                                                                                                                                                                                          | Mapping participation in research |
| <b>Fence</b>        | Are there any things we missed in this interview?     | a) Do you have any questions/comments?<br>b) We would like to thank you very much for your participation! We hope that the therapy has brought you a little further. After this interview has been transcribed, the recording will be destroyed.<br>c) Processing the outcome of the research takes a long time; Reporting results? | Exiting/ catching missed comments |

### Interviewguide 2) Art Therapist participants:

| Subject                | Main question                                                                           | Sub-questions                                                                                                                                                         | Purpose                               |
|------------------------|-----------------------------------------------------------------------------------------|-----------------------------------------------------------------------------------------------------------------------------------------------------------------------|---------------------------------------|
| <b>Opening</b>         | Hello, how nice that we can also interview you for the research.                        | a) I'm going to turn on the recorder and then, as far as I'm concerned, we can start the interview.                                                                   | Open Call / Start Recording           |
| <b>Patient journey</b> | How did the patient end up with you?                                                    | a) Was that done through a referral?<br>b) Who made the referral?<br>c) Do you know what care the patient has received so far?                                        |                                       |
| <b>General view</b>    | How did you experience art therapy in general?                                          | d) How did you find working with this protocol?<br>e) What can the protocol contribute to the overall treatment of PTSD?<br>f) Would you use the protocol more often? | Painting a general picture            |
| <b>Visual work</b>     | How did you go about the sessions?                                                      | a) What kind of therapeutic attitude have you adopted?                                                                                                                | Mapping out the way of giving therapy |
| <b>Changes</b>         | What changes in symptoms have you noticed in the patient since you started art therapy? | a) Has anything improved since you started?<br>b) Has anything deteriorated since you started?                                                                        | Mapping changes in complaints         |
| <b>Cause changes</b>   | What do you think have caused these changes?                                            | a) What helped during the sessions? Think of materials, instructions or your own attitude?                                                                            | Attribution mapping                   |

|                              |                                                                     |                                                                                                                                                                                                                                                                                |                                   |
|------------------------------|---------------------------------------------------------------------|--------------------------------------------------------------------------------------------------------------------------------------------------------------------------------------------------------------------------------------------------------------------------------|-----------------------------------|
| <b>Protocol Improvements</b> | Are there things you would change about the treatment you received? | <ul style="list-style-type: none"> <li>a) Are there things that didn't fit in well with practice?</li> <li>b) Are there things that have been missed in this protocol?</li> <li>c) Are there things that could be improved in the communication about the research?</li> </ul> | Mapping suggestions               |
| <b>Fence</b>                 | Are there any things we missed in this interview?                   | <ul style="list-style-type: none"> <li>a) Do you have any questions/comments?</li> <li>b) Would you like to be informed of the outcome of the investigation?</li> <li>c) We would like to thank you very much for your participation!</li> </ul>                               | Exiting/ catching missed comments |

### Appendix: Questions main practitioner (from 'Fill-in file Therapists')

Pay attention to anonymity!

1. Do you think that the 'trauma-focused art therapy' protocol has been effective for the patient?
2. Do you see a change in the patient and if so, in what way? (this can be a positive or negative change)
3. Do you have any additional comments?
