# Supplementary material for: Effectiveness of trauma-focused art therapy (TFAT) for psychological trauma: study protocol of a multiple-baseline single-case experimental design
Source: PubMed Central journal article supplement — BMJ Open. 2024 Jan 29;14(1):e081917. doi: 10.1136/bmjopen-2023-081917 (PMC10826536; doi:10.1136/bmjopen-2023-081917), 2024-01-29
Supplement: bmjopen-2023-081917supp003.pdf [file bmjopen-2023-081917supp003.pdf]

**Supplementary File C: Summary of clinical trial registration**

| Data category                                 | Information <sup>32</sup>                                                                                                                                                                                                                                                                                                                   |
|-----------------------------------------------|---------------------------------------------------------------------------------------------------------------------------------------------------------------------------------------------------------------------------------------------------------------------------------------------------------------------------------------------|
| Primary registry and trial identifying number | ClinicalTrials.gov<br>NCT05593302                                                                                                                                                                                                                                                                                                           |
| Date of registration in primary registry      | Oktober 12, 2022                                                                                                                                                                                                                                                                                                                            |
| Secondary identifying numbers                 | Unique protocol ID: TFAT SU1424 -101                                                                                                                                                                                                                                                                                                        |
| Source(s) of monetary or material support     | Care and Cure by Creativity (CCC) foundation                                                                                                                                                                                                                                                                                                |
| Primary sponsor                               | Care and Cure by Creativity (CCC) foundation                                                                                                                                                                                                                                                                                                |
| Secondary sponsor(s)                          | -                                                                                                                                                                                                                                                                                                                                           |
| Contact for public queries                    | <i>Dr. Suzanne Haeyen</i> , [ <a href="mailto:suzanne.haeyen@han.nl">suzanne.haeyen@han.nl</a> ]                                                                                                                                                                                                                                            |
| Public title                                  | The Effectiveness of Trauma Focused Art Therapy (TFAT)                                                                                                                                                                                                                                                                                      |
| Scientific title                              | The Effectiveness of Trauma Focused Art Therapy (TFAT): a Multiple Baseline Single Case Experimental Design                                                                                                                                                                                                                                 |
| Countries of recruitment                      | The Netherlands                                                                                                                                                                                                                                                                                                                             |
| Health condition(s) or problem(s) studied     | Psychological Trauma                                                                                                                                                                                                                                                                                                                        |
| Intervention(s)                               | Trauma-Focused Art Therapy (TFAT)                                                                                                                                                                                                                                                                                                           |
| Key inclusion and exclusion criteria          | Ages eligible for study: $\geq 18$ years<br>Sexes eligible for study: both<br>Accepts healthy volunteers: no<br>Inclusion criteria: adult patient ( $\geq 18$ years), being eligible for art therapy on discretion of multidisciplinary treatment panel (consisting of a psychiatrist, psychologists, sociotherapists, and art therapists). |

|                         |                                                                                                                                                                                                                                                                                                                                                                                                                                                                                            |
|-------------------------|--------------------------------------------------------------------------------------------------------------------------------------------------------------------------------------------------------------------------------------------------------------------------------------------------------------------------------------------------------------------------------------------------------------------------------------------------------------------------------------------|
|                         | Exclusion criteria: intellectual disability (precluding the filling out of questionnaires).                                                                                                                                                                                                                                                                                                                                                                                                |
| Study type              | <p>Interventional</p> <p>Allocation: patients randomised for the time at which they start the intervention: CONSORT recognises this design as an N=1 Trial, please refer to <a href="https://www.consort-statement.org/extensions/overview/n-of-1">https://www.consort-statement.org/extensions/overview/n-of-1</a></p> <p>Intervention model: Multiple baseline single case experimental design</p> <p>Masking: None (Open Label)</p> <p>Primary purpose: Treatment</p> <p>Phase: N/A</p> |
| Date of first enrolment | October 10, 2022                                                                                                                                                                                                                                                                                                                                                                                                                                                                           |
| Target sample size      | 12                                                                                                                                                                                                                                                                                                                                                                                                                                                                                         |
| Recruitment status      | Recruiting                                                                                                                                                                                                                                                                                                                                                                                                                                                                                 |
| Primary outcome(s)      | - SERATS                                                                                                                                                                                                                                                                                                                                                                                                                                                                                   |
| Key secondary outcomes  | <ul style="list-style-type: none"> <li>- PCL-5</li> <li>- RSES</li> <li>- RS</li> <li>- BDI-II</li> <li>- MHC-SF</li> </ul>                                                                                                                                                                                                                                                                                                                                                                |
